# Supplementary material for: Absence of holistic sexual health understandings among men and women in deprived areas of Scotland: qualitative study
Source: Springer Nature journal article supplement (doi:10.1186/s12889-019-6558-y), 2019-03-12
Supplement: MOESM1 [file 16541332]

## INTRODUCTIONS:-

*[introductory conversation]*

### PART 1: WHERE YOU LIVE:-

- ❑ **So what's it like to live around here?**
  - good/bad aspects – and why
- ❑ **What's it like for women around here?**
  - Why might that be?
  - Any differences

### PART 2: BEING A MAN

- ❑ **Here is a selection of images of men – some are famous, some are not.**
  - **Image Card 1 [Images A - B: - Chewin' the fat NEDs + Begbie]**
  - **Image card 2 [Images C - D:- Andy Murray + Thomas Hitzlsperger]**
  - **Image card 3 [Images E - F:- Kevin Bridges + Hardeep Singh Kohli]**
  - **Image card 4 [Images G - H:- Hipster + Robert Preston]**
    - What do you think about these men? | Any of these guys fit in here?
    - So, what is a typical man from [area] like?
    - Which of these images do you identify with?
  
- ❑ **Here is a selection of images of women– some are famous, some are not**
  - ❑ **Image card 5 [Images A - B: - Stereotypical NED + Subtle NED]**
  - ❑ **Image Card 6 [Images C - D:- Rebecca Adlington + Jessica Ennis]**
  - ❑ **Image card 7 [Images E - F:- Paris Hilton + Shami Chakrabarti]**
  - ❑ **Image card 8 [Images G - H:- Housewife + 'Gold digger']**
    - What do you think about these women?
    - Which of these women seem like a typical woman from where you live?
    - So let's play snog, marry or avoid... Why / expand etc.
  
- ❑ **How do men act around women in [area]?**
  - Would you act differently with women than with men?
  - Are there any things which a man \*shouldn't\* do around women?
  - How about different kinds of women? **[refer to images]**
  
- ❑ **How do women act around men?**
  - Are there any things women shouldn't do around men?

### **PART 3: SEXUAL HEALTH/BEHAVIOURS**

#### **□ How did you learn about sex?**

- School / parents / friends?
- Magazines / the Sun /The Star
- Porn?
  - How about boys growing-up today?

#### **□ How about women?**

- Would they have learned about sex in the same way?
  - What about girls growing up today?

#### **□ What does sex mean to you?**

- How important is sex in your lives?
- Why do you think that is / can you expand..?
- What role might **porn** play?

#### **□ What does sex mean to women?**

- Probes as above

#### **□ Condoms. What do you think about them?**

- Do you use them?
- How about women carrying condoms?

## **PART 4: CONSENT, ABUSE, ALCOHOL**

I'm going to show you a few images with captions, which have been taken from the Internet. I'd like for you to look at the image and tell me what you think.

### **[Image card 9:- Image A, Rohypnol]**

- What do you think of this image? | What's happening here?**
  - What \*should\* be happening here?
- Have you seen something like this happen? | What would you do if you saw this happening?**
- It calls women 'teasing bitches'. What do you think about that?**
- What role has alcohol played?**
  - Does alcohol play a role in your sex life? | Do you drink to pull?
  - Do you need it? | How does drinking make you feel?
  - Where do you tend to drink?

### **[Image card 10:- Image B, "Too Drunk"]**

- This image is from an ad campaign. What do you think of it?
  - What do you think of the ad?
  - **The ad states "too drunk". What do you think 'too drunk' means?**
  - **How would you tell?**

### **[Image card 11:- Image C, "Consent in relationships"]**

- This is a series of images of a young couple. Neither of them are intoxicated**
  - What is happening in this scene?

### **[Image card 12:- Image D, physical abuse]**

- What do you think of the image?

### **[Image card 13:- Image E, Verbal abuse]**

- What do you think of this image?

**Considering what we've just discussed, what do you think 'sexual health' means?**
